# Supplementary material
Source: PubMed Central journal article supplement (PMC2639738)
Supplement: ssn063_1.pdf [file ssn063_1.pdf]

A

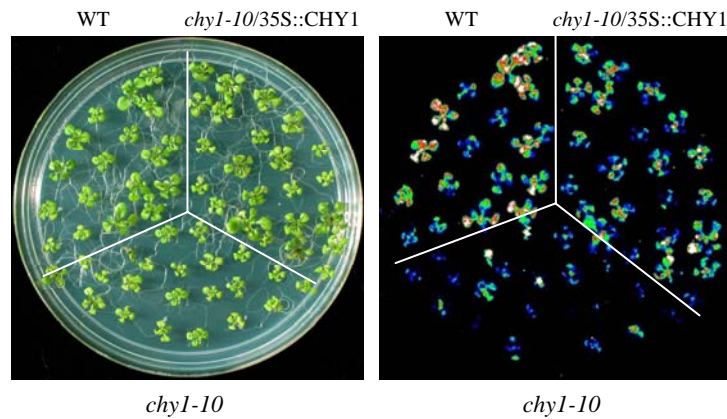

B

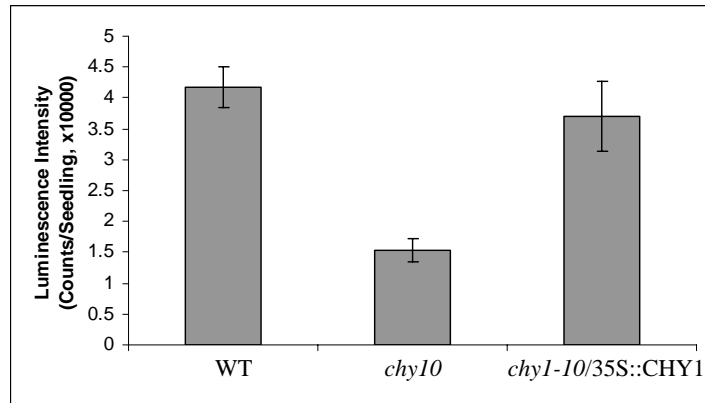

Rescue of *CBF3-LUC* expression defect in *chy1-10* mutant plants by *CHY1* overexpression

(A) Luminescence images of wild-type (WT), mutant (*chy1-10*) and *chy1-10* overexpressing *CHY1* (*chy1-10/35S::CHY1*) taken after cold treatment at 4°C in the light for 6 h.

(B) Quantification of luminescence intensity of WT, *chy1-10*, and *chy1-10/35S::CHY1* seedlings.

Data shown are mean values with standard deviation ( $n = 20$ ).
